# Supplementary material for: A Six-Gene Prognostic and Predictive Radiotherapy-Based Signature for Early and Locally Advanced Stages in Non-Small-Cell Lung Cancer
Source: MDPI journal article supplement (doi:10.3390/cancers14092054), 2022-04-19
Supplement: s1 [file s1]

**Table S1.** Histological information and the molecular profile of some relevant NSCLC mutations of the cell lines used in this study. Information on the histology and molecular profile of relevant genes in NSCLC. CBA: bronchioloalveolar carcinoma, CCG: large cell carcinoma. WT: wild type (native). MUT: mutated.

| Cell line | Histology      | EGFR          | KRAS | Others                          |
|-----------|----------------|---------------|------|---------------------------------|
| A549      | Adenocarcinoma | WT            | WT   |                                 |
| H1650     | CBA            | MUT (exon 19) | WT   |                                 |
| H1975     | Adenocarcinoma | MUT (790M)    | WT   | CDKN2A/Pi3KCA/TP53              |
| H2009     | Adenocarcinoma | WT            | MT   |                                 |
| H358      | CBA            | WT            | MT   |                                 |
| H460      | CCG            | WT            | MT   |                                 |
| H520      | SCC            | WT            | nd   |                                 |
| HCC827    | Adenocarcinoma | MUT           | WT   |                                 |
| H1437     | Adenocarcinoma |               |      | CDKN2A/TP53                     |
| H1781     | Adenocarcinoma |               |      |                                 |
| H2228     | Adenocarcinoma |               |      | ALK                             |
| H226      | SCC            |               |      |                                 |
| Calu 1    | SCC            |               | MT   |                                 |
| Calu 3    | Adenocarcinoma | WT            | MT   | Amplification ERBB2 /p53/CDKN2A |
| H3122     | Adenocarcinoma |               |      | ALK                             |

**Table S2.** SF2 value obtained from the scientific literature.

| Cell line | SF2 value found in the scientific literature |                  |             |                 |             |                 |              |                  |                    |
|-----------|----------------------------------------------|------------------|-------------|-----------------|-------------|-----------------|--------------|------------------|--------------------|
|           | Carmichael<br>1989                           | Eschrich<br>2009 | Tumati 2013 | Abazeed<br>2014 | Ahn<br>2014 | Anakura<br>2019 | Jung<br>2019 | Girdhani<br>2019 | Our SF2<br>results |
| H1975     |                                              |                  |             |                 |             | 0.47/0.47       |              |                  | 0.89               |
| A549      | 0.82                                         | 0.61             | 0.73        |                 | 0.58        | 0.71/0.53       | 0.896        | 0.7              | 0.83               |
| HCC827    |                                              |                  |             |                 |             | 0.35/0.55       |              | 0.67             | 0.74               |
| H358      | 0.64                                         |                  |             |                 |             |                 |              | 0.62             | 0.67               |
| H2228     |                                              |                  | 0.76        |                 |             |                 |              |                  | 0.65               |
| H3122     |                                              |                  | 0.64        |                 |             |                 |              |                  | 0.62               |
| H460      | 0.64                                         | 0.84             | 0.54        |                 |             | 0.53/0.72       | 0.518        | 0.76             | 0.61               |
| H1650     |                                              |                  |             |                 | 0.4         | 0.26/0.23       |              | 0.27             | 0.57               |
| CALU1     |                                              |                  |             | 0.56            |             |                 |              |                  | 0.45               |
| H520      | 0.49                                         |                  |             | 0.48            |             | 0.49/0.83       |              | 0.54             | 0.49               |
| H1437     |                                              |                  |             |                 |             |                 |              |                  | 0.45               |
| H226      | 0.61                                         | 0.79             |             | 0.57            |             |                 |              |                  | 0.43               |
| CALU3     |                                              |                  |             |                 |             |                 |              |                  | 0.32               |
| H2009     |                                              |                  |             |                 |             |                 |              |                  | 0.23               |
| H1781     |                                              |                  |             |                 |             |                 |              |                  | 0.18               |

**Table S3.** List of differentially expressed genes between radiosensitive and radioresistant cell lines.

| GEN      | Expression<br>(log2FC) | GEN          | Expression (log2FC) | GEN     | Expression (log2FC) |
|----------|------------------------|--------------|---------------------|---------|---------------------|
| AASS     | -1.71                  | KCNS3        | -1.66               | TMEM144 | 1.99                |
| ABCD3    | 1.15                   | KIAA1324L    | -1.63               | TNIK    | -1.45               |
| ADAMTS12 | -1.30                  | KLHL24       | -1.00               | TRIM14  | 1.10                |
| AHNAK2   | 2.29                   | LCA5         | -1.02               | TRIM6   | 1.80                |
| ALDH6A1  | -1.32                  | LINC00597    | -1.20               | TRIM7   | 1.67                |
| APOBEC3B | 2.76                   | LMO3         | -1.25               | USP18   | 1.05                |
| ARG2     | -1.66                  | LOC100287896 | -1.27               | USP43   | 1.24                |
| ARHGAP42 | 1.01                   | LRIG1        | -2.30               | VWA5A   | 1.07                |

|          |       |         |       |         |       |
|----------|-------|---------|-------|---------|-------|
| ATP6AP1L | -1.43 | LRRC1   | -1.01 | ZC3H6   | -1.06 |
| BASP1    | 2.25  | MAP9    | 2.07  | ZNF114  | 2.56  |
| BTNL9    | 1.41  | MCM4    | 1.37  | ZNF30   | 1.35  |
| C4orf32  | 1.74  | MLF1    | -1.53 | ZNF470  | 1.30  |
| CD109    | 3.41  | MPDU1   | 1.05  | ZNF480  | 1.16  |
| CDKN2B   | -2.24 | NANP    | 1.00  | ABCC3   | 1.11  |
| CDON     | -1.00 | NDRG4   | 1.27  | ABCC5   | -1.05 |
| CELF2    | -1.01 | NGEF    | 1.36  | DLL3    | 1.68  |
| CEP70    | -1.05 | NTNG1   | -1.42 | MAN1A1  | -2.05 |
| CMTM3    | 1.43  | PAG1    | 1.36  | NUCB2   | -1.09 |
| CYBRD1   | -1.51 | PAIP2B  | -1.39 | PCDHB13 | 1.57  |
| CYP27C1  | 1.33  | PERP    | 1.06  | PCDHB14 | 1.68  |
| DVL3     | -1.02 | PFKFB4  | 1.17  | PCDHB2  | 2.09  |
| EDNRA    | 2.23  | PHF19   | 1.85  | PCDHB8  | 1.14  |
| EGLN3    | 1.51  | PPFIA3  | 1.06  | CST3    | 1.64  |
| ELOVL6   | 1.02  | PSMB10  | 1.05  | SPOCK1  | 3.11  |
| EOGT     | 1.02  | PXYLP1  | -1.25 | TNFAIP8 | 1.27  |
| EPHX2    | 1.37  | RFC3    | 1.01  | TGFBI   | 2.24  |
| FAM117A  | -1.55 | RHOBTB3 | 1.65  | IGFBP5  | -3.04 |
| FARP1    | -1.17 | RMDN2   | 1.18  | VEGFA   | -1.05 |
| FNBP1    | 1.06  | RWDD2A  | -1.34 | FABP5   | 1.98  |
| FYN      | -2.24 | SDR16C5 | 1.84  | MCCC1   | -1.34 |
| GABRB3   | 2.06  | SELENOP | -2.17 | EMB     | 1.44  |
| GALC     | 1.93  | SEMA3A  | 2.05  | CDH2    | -2.43 |
| GIMAP2   | 1.09  | SLAMF7  | 1.30  | MAGI2   | -1.46 |
| GOLM1    | 1.10  | SLFN13  | 1.75  | PPARA   | -1.01 |
| GPR160   | -1.86 | SNORA12 | 1.29  | SH3RF2  | 1.57  |
| GPRC5B   | -1.55 | SNX5    | 1.06  | SYTL2   | 1.85  |
| HECW2    | 1.50  | SPEG    | -1.32 | NR3C2   | -1.30 |
| HENMT1   | 1.36  | ST20    | -1.11 | PAQR8   | -1.11 |
| HOXB3    | -1.37 | ST3GAL3 | -1.30 | SPTBN1  | 1.12  |
| HPGD     | 3.65  | SYNPO2  | 1.07  | TUBB3   | 1.25  |
| JUN      | -1.73 | TM4SF18 | 2.41  | JPH1    | -2.19 |
| KCNQ1OT1 | -1.04 | TMEM133 | 1.02  | SYNM    | 1.81  |
|          |       |         |       | BMP5    | 1.27  |

**Table S4.** Summary of the characteristics of the 107 patients in the main study cohort.

| Variables            | N  | %    |
|----------------------|----|------|
| Age at diagnosis     |    |      |
| < 40 Years           | 1  | 0.9  |
| [40-49]              | 8  | 7.5  |
| [50-59]              | 28 | 26.2 |
| [60-69]              | 37 | 34.6 |
| ≥70                  | 32 | 29.9 |
| nd                   | 1  | 0.9  |
| Year of dianosis     |    |      |
| <2000                | 5  | 4.7  |
| [2000-2009]          | 51 | 47.7 |
| ≥ 2010               | 36 | 33.6 |
| nd                   | 15 | 14   |
| gender               |    |      |
| woman                | 48 | 44.9 |
| male                 | 59 | 51.4 |
| Tumoral stage (AJCC) |    |      |
| Estadio I            | 24 | 22.4 |

|           |                |    |      |
|-----------|----------------|----|------|
| Histology | Estadio II     | 33 | 30.8 |
|           | Estadio III    | 50 | 46.7 |
| Status    | Adenocarcinoma | 55 | 51.4 |
|           | SCC            | 52 | 48.6 |
|           | alive          | 50 | 46.7 |
|           | death          | 57 | 53.3 |

**Table S5.** Results of the univariate analysis (log rank test) for potential prognostic and predictive factors of response.

| Variable             | Categories     | n  | Median OS (months) | p (Log Rank) | Median PFS (months) | p (Log Rank) |
|----------------------|----------------|----|--------------------|--------------|---------------------|--------------|
| Age                  | < 63 years     | 47 | 37.6               | 0.346        | 25.38               | 0.457        |
|                      | ≥ 63 years     | 59 | 32                 |              | 22.68               |              |
|                      | nd             | 1  | -                  |              | -                   |              |
| Year of diagnosis    | < 2008         | 39 | 28.9               | 0.128        | 22.91               | 0.831        |
|                      | ≥ 2008         | 53 | 44.19              |              | 26.14               |              |
|                      | nd             | 15 | -                  |              | -                   |              |
| Sex                  | Male           | 59 | 37.58              | 0.42         | 26                  | 0.612        |
|                      | Female         | 48 | 32.45              |              | 22.75               |              |
| Histologic subtype   | Adenocarcinoma | 55 | 29.46              | 0.158        | 17.46               | 0.028        |
|                      | SCC            | 52 | 43.89              |              | 29.98               |              |
| T component          | T1 + T2        | 78 | 32.84              | 0.188        | 26                  | 0.1          |
|                      | T3 + T4        | 29 | 24.13              |              | 12.66               |              |
| Nodal load           | n0-1           | 65 | 37.58              | 0.37         | 22.92               | 0.814        |
|                      | n2-n3          | 40 | 27.45              |              | 17.62               |              |
|                      | nd             | 2  | ----               |              | -                   |              |
| Stage                | I and II       | 57 | 43.89              | 0.051        | 26.96               | 0.183        |
|                      | III            | 50 | 26.53              |              | 15.88               |              |
| Prognostic signature | Low risk       | 53 | 71.473             | <0.001       | 47.11               | <0.001       |
|                      | High risk      | 54 | 24.131             |              | 12.65               |              |

**Survival data cohort**

Median OS (months): 32.7 (CI at 95% 25-40.4)

Median PFS (months): 22.9 (CI at 95% 15-30.8)

Median cancer-specific survival (months): 41.6 (CI at 95% 30.1-53.1)

OS: overall survival; PFS: progression-free survival; CI= confidence interval; HR= hazard ratio; nd: not determined; N: sample number.

**Table S6.** Genes with a significant impact ( $p < 0.05$ ) on overall survival measured by univariate Cox regression. They are shown in descending order by p value.

| Gen      | Beta   | HR (IHR (95% CI))   | wald.Wald test | Valor p value |
|----------|--------|---------------------|----------------|---------------|
| APOBEC3B | -0.303 | 0.738 (0.623-0.875) | 12.30          | 0.000456      |
| GOLM1    | 0.352  | 1.42 (1.15-1.76)    | 10.20          | 0.001430      |
| FAM117A  | -0.473 | 0.623 (0.461-0.843) | 9.43           | 0.002130      |
| CDH2     | 0.283  | 1.33 (1.09-1.61)    | 8.26           | 0.004060      |
| KCNQ1OT1 | 1.19   | 3.27 (1.44-7.43)    | 8.03           | 0.004600      |
| SDR16C5  | 0.197  | 1.22 (1.05-1.41)    | 7.10           | 0.007730      |
| KLHL24   | -0.373 | 0.688 (0.512-0.926) | 6.10           | 0.013500      |
| PCDHB13  | 0.315  | 1.37 (1.06-1.78)    | 5.67           | 0.017300      |
| PCDHB8   | 0.244  | 1.28 (1.04-1.56)    | 5.66           | 0.017400      |
| PCDHB2   | 0.222  | 1.25 (1.04-1.5)     | 5.61           | 0.017900      |

|         |        |                     |      |          |
|---------|--------|---------------------|------|----------|
| RHOBTB3 | 0.24   | 1.27 (1.04-1.55)    | 5.49 | 0.019100 |
| NUCB2   | 0.468  | 1.6 (1.08-2.37)     | 5.44 | 0.019700 |
| BASP1   | 0.194  | 1.21 (1.03-1.43)    | 5.27 | 0.021800 |
| TRIM6   | 0.284  | 1.33 (1.02-1.72)    | 4.58 | 0.032400 |
| ABCC5   | -0.166 | 0.847 (0.726-0.987) | 4.52 | 0.033600 |
| EPHX2   | -0.272 | 0.762 (0.587-0.989) | 4.18 | 0.040900 |
| LRIG1   | -0.283 | 0.754 (0.574-0.989) | 4.16 | 0.041400 |
| TMEM144 | 0.341  | 1.41 (1.01-1.95)    | 4.11 | 0.042500 |
| PXYLP1  | -0.373 | 0.688 (0.479-0.989) | 4.08 | 0.043300 |
| TUBB3   | 0.194  | 1.21 (1.01-1.47)    | 4.05 | 0.044100 |
| USP43   | 0.252  | 1.29 (1-1.65)       | 3.92 | 0.047600 |

Beta= regression coefficient; HR= hazard ratio; CI= confidence interval;.

**Table S7.** Genes with a significant impact ( $p < 0.05$ ) on PFS measured by univariate Cox regression. Genes are sorted in descending order by p value.

| Gene     | Beta   | HR (95% CI)         | Wald test | P value  |
|----------|--------|---------------------|-----------|----------|
| GOLM1    | 0.467  | 1.6 (1.3-1.96)      | 20.20     | 7.00e-06 |
| APOBEC3B | -0.323 | 0.724 (0.621-0.844) | 17.00     | 3.75e-05 |
| KCNQ1OT1 | 1.41   | 4.08 (1.82-9.15)    | 11.60     | 6.58e-04 |
| PCDHB2   | 0.239  | 1.27 (1.08-1.5)     | 8.29      | 4.00e-03 |
| TUBB3    | 0.257  | 1.29 (1.08-1.54)    | 8.13      | 4.37e-03 |
| USP43    | 0.333  | 1.4 (1.11-1.76)     | 7.99      | 4.72e-03 |
| NTNG1    | 0.369  | 1.45 (1.12-1.87)    | 7.78      | 5.29e-03 |
| PCDHB8   | 0.259  | 1.3 (1.08-1.56)     | 7.76      | 5.35e-03 |
| BASP1    | 0.209  | 1.23 (1.06-1.43)    | 7.55      | 6.01e-03 |
| FARP1    | 0.429  | 1.54 (1.12-2.1)     | 7.29      | 6.95e-03 |
| MPDU1    | 0.636  | 1.89 (1.19-3.01)    | 7.19      | 7.31e-03 |
| ATP6AP1L | 0.526  | 1.69 (1.14-2.51)    | 6.87      | 8.74e-03 |
| PXYLP1   | -0.413 | 0.662 (0.473-0.926) | 5.80      | 1.60e-02 |
| CYP27C1  | 0.229  | 1.26 (1.04-1.52)    | 5.77      | 1.63e-02 |
| ABCC5    | -0.17  | 0.844 (0.733-0.971) | 5.59      | 1.81e-02 |
| PAIP2B   | 0.319  | 1.38 (1.05-1.79)    | 5.54      | 1.86e-02 |
| PCDHB13  | 0.279  | 1.32 (1.05-1.67)    | 5.52      | 1.88e-02 |
| KLHL24   | -0.33  | 0.719 (0.545-0.947) | 5.51      | 1.90e-02 |
| SDR16C5  | 0.159  | 1.17 (1.03-1.34)    | 5.47      | 1.94e-02 |
| CDH2     | 0.208  | 1.23 (1.03-1.47)    | 5.44      | 1.97e-02 |
| RHOBTB3  | 0.205  | 1.23 (1.03-1.47)    | 5.04      | 2.47e-02 |
| HECW2    | 0.312  | 1.37 (1.04-1.8)     | 4.88      | 2.72e-02 |
| FAM117A  | -0.328 | 0.721 (0.538-0.966) | 4.81      | 2.83e-02 |
| SPTBN1   | 0.36   | 1.43 (1.03-1.99)    | 4.68      | 3.06e-02 |
| CELF2    | 0.189  | 1.21 (1.01-1.45)    | 4.28      | 3.85e-02 |
| JPH1     | -0.212 | 0.809 (0.66-0.992)  | 4.13      | 4.21e-02 |
| SLFN13   | 0.205  | 1.23 (1.01-1.5)     | 4.11      | 4.27e-02 |
| ELOVL6   | -0.212 | 0.809 (0.655-0.998) | 3.93      | 4.75e-02 |
| MLF1     | -0.187 | 0.829 (0.688-0.998) | 3.90      | 4.82e-02 |

Beta= regression coefficient; HR= hazard ratio; CI= confidence interval; ADC= adenocarcinoma; SCC= squamous cell carcinoma.

**Table S8.** Results of the analysis of the common gene signature by univariate Cox regression for OS and PFS.

| Histology  |      | Beta | HR (95% CI for HR) | Wald test | P value  | CI          |
|------------|------|------|--------------------|-----------|----------|-------------|
| Lung NSCLC | (OS) | 1.17 | 3.23 (2.11-4.95)   | 20.2      | 6.66e-08 | 0.71±0.0373 |

|     |       |      |                  |      |          |             |
|-----|-------|------|------------------|------|----------|-------------|
|     | (SLP) | 1.24 | 3.46 (2.3-5.,2)  | 35.4 | 2.62e-09 | 0.72±0.032  |
| ADC | (OS)  | 1.26 | 3.52 (1.85-6.69) | 14.8 | 0.00012  | 0.69 ±0.055 |
|     | (SLP) | 1.32 | 3.76 (2.03-6.97) | 17.6 | 2.68e-05 | 0.72±0.047  |
| SCC | (OS)  | 1.35 | 3.87 (1.91-7.83) | 14.2 | 0.00016  | 0.73±0.05   |
|     | (SLP) | 1.33 | 3.78 (1.93-7.42) | 15   | 0.00011  | 0.73±0.048  |

Beta= regression coefficient; HR= hazard ratio; CI= confidence interval; ADC= adenocarcinoma; SCC= squamous cell carcinoma.

**Table S9.** Bivariate Cox regression analysis. Assessment of the effect of independent categorical variables on the HR of the prognostic gene signature of OS.

| Variables          | Beta  | ET   | Wald  | HR   | 95,0% CI for HR |      | P value |
|--------------------|-------|------|-------|------|-----------------|------|---------|
|                    |       |      |       |      | Low             | High |         |
| Signature for OS   | 1.09  | 0.28 | 15.04 | 2.99 | 1.72            | 5.20 | 0.00    |
| Age at diagnosis   | -0.34 | 0.27 | 1.58  | 0.71 | 0.42            | 1.21 | 0.21    |
| Signature for OS   | 1.29  | 0.31 | 16.93 | 3.65 | 1.97            | 6.76 | 0.00    |
| Year of diagnosis  | 0.52  | 0.31 | 2.88  | 1.69 | 0.92            | 3.09 | 0.09    |
| Signature for OS   | 1.11  | 0.29 | 14.58 | 3.04 | 1.72            | 5.39 | 0.00    |
| Gender             | 0.06  | 0.28 | 0.05  | 1.07 | 0.62            | 1.83 | 0.82    |
| Signature for OS   | 1.20  | 0.32 | 13.69 | 3.32 | 1.76            | 6.26 | 0.00    |
| Histologic subtype | -0.20 | 0.31 | 0.42  | 0.82 | 0.45            | 1.50 | 0.52    |
| Signature for OS   | 1.11  | 0.28 | 15.50 | 3.03 | 1.74            | 5.26 | 0.00    |
| T component        | -0.42 | 0.29 | 2.10  | 0.65 | 0.37            | 1.16 | 0.15    |
| Signature for OS   | 1.09  | 0.29 | 13.99 | 2.98 | 1.68            | 5.28 | 0.00    |
| Nodal load         | -0.02 | 0.28 | 0.01  | 0.98 | 0.57            | 1.68 | 0.93    |
| Signature for OS   | 1.03  | 0.29 | 12.95 | 2.81 | 1.60            | 4.93 | 0.00    |
| Tumor stage (AJCC) | -0.32 | 0.27 | 1.36  | 0.73 | 0.43            | 1.24 | 0.24    |

CI= confidence interval; HR= Hazard ratio

**Table S10.** Univariate Cox regression analysis. Impact of the independent categorical variables on the PFS.

| Variables             | Beta  | ET   | Wald  | HR   | 95% CI for HR |      | P value |
|-----------------------|-------|------|-------|------|---------------|------|---------|
|                       |       |      |       |      | Low           | High |         |
| Age at diagnosis      | -0.18 | 0.25 | 0.55  | 0.83 | 0.51          | 1.35 | 0.46    |
| Year of diagnosis     | 0.06  | 0.27 | 0.05  | 1.06 | 0.62          | 1.81 | 0.83    |
| Gender                | -0.12 | 0.24 | 0.25  | 0.88 | 0.55          | 1.43 | 0.62    |
| Hystologic subtype    | 0.55  | 0.25 | 4.74  | 1.74 | 1.06          | 2.86 | 0.03    |
| T Component           | -0.44 | 0.27 | 2.63  | 0.64 | 0.38          | 1.10 | 0.10    |
| Nodal Load            | 0.06  | 0.25 | 0.06  | 1.06 | 0.65          | 1.74 | 0.81    |
| Tumoral stage (AJCC)  | -0.32 | 0.24 | 1.76  | 0.72 | 0.45          | 1.17 | 0.18    |
| Genetic signature SLP | 1.30  | 0.27 | 23.45 | 3.66 | 2.16          | 6.18 | <0.0001 |

CI= confidence interval; HR= Hazard ratio

**Table S11.** Bivariate Cox regression analysis. Assessment of the effect of independent categorical variables on the HR of the prognostic gene signature of PFS.

| Variables          | Beta  | ET   | Wald  | HR   | 95% CI for HR |      | P value |
|--------------------|-------|------|-------|------|---------------|------|---------|
|                    |       |      |       |      | Low           | High |         |
| Signature for PFS  | 1.28  | 0.27 | 23.07 | 3.60 | 2.14          | 6.08 | 0.00    |
| Age at diagnosis   | -0.27 | 0.25 | 1.21  | 0.76 | 0.47          | 1.24 | 0.27    |
| Signature for PFS  | 1.46  | 0.30 | 24.14 | 4.33 | 2.41          | 7.76 | 0.00    |
| Year of diagnosis  | 0.09  | 0.28 | 0.12  | 1.10 | 0.64          | 1.89 | 0.73    |
| Signature for PFS  | 1.31  | 0.27 | 23.50 | 3.72 | 2.19          | 6.33 | 0.00    |
| Gender             | 0.10  | 0.25 | 0.16  | 1.11 | 0.68          | 1.81 | 0.69    |
| Signature for PFS  | 1.33  | 0.30 | 19.13 | 3.79 | 2.09          | 6.89 | 0.00    |
| Histologic subtype | -0.07 | 0.29 | 0.06  | 0.93 | 0.53          | 1.64 | 0.80    |
| Signature for PFS  | 1.31  | 0.27 | 24.19 | 3.69 | 2.19          | 6.21 | 0.00    |
| T component        | -0.51 | 0.28 | 3.37  | 0.60 | 0.35          | 1.04 | 0.07    |
| Signature for PFS  | 1.32  | 0.27 | 22.90 | 3.73 | 2.17          | 6.39 | 0.00    |
| Nodal load         | 0.32  | 0.26 | 1.50  | 1.37 | 0.83          | 2.28 | 0.22    |
| Signature for PFS  | 1.28  | 0.27 | 21.99 | 3.59 | 2.10          | 6.11 | 0.00    |
| Tumor stage (AJCC) | -0.10 | 0.25 | 0.15  | 0.91 | 0.56          | 1.48 | 0.70    |

CI= confidence interval; HR= Hazard ratio

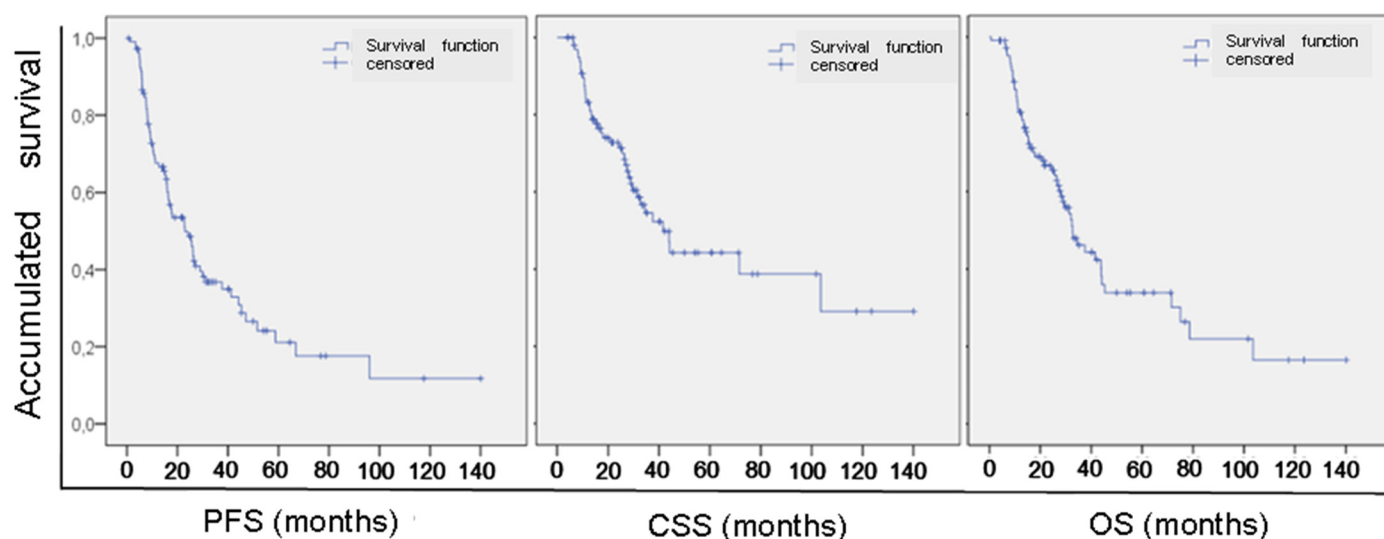**Figure S1.** Kaplan Meier curves showing progression-free survival (PFS), cancer-specific survival (SCE), and overall survival (OS) of the cohort of interest.

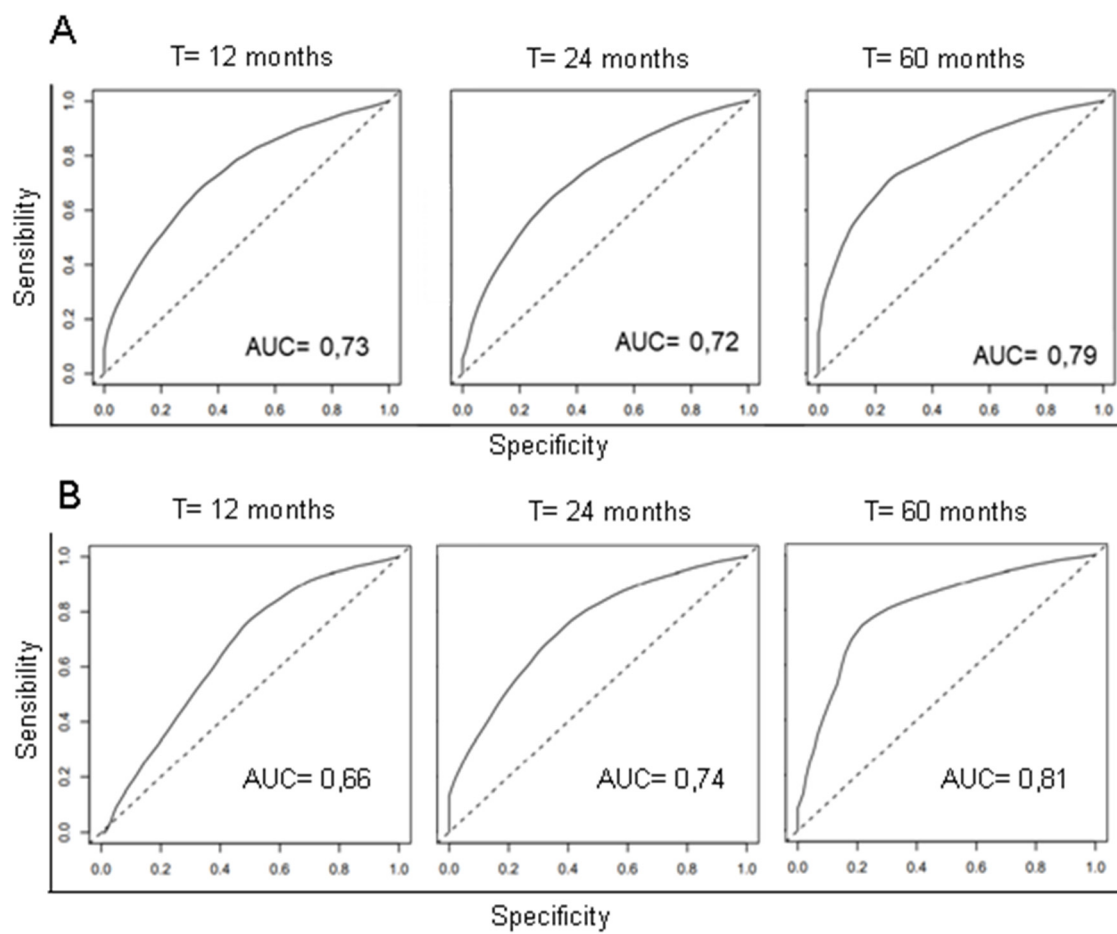

**Figure S2.** (A) Curvas ROC en función del tiempo (T). AUC: área bajo la curva. OS; (B) Curvas ROC en función del tiempo (T). AUC: área bajo la curva. PFS.

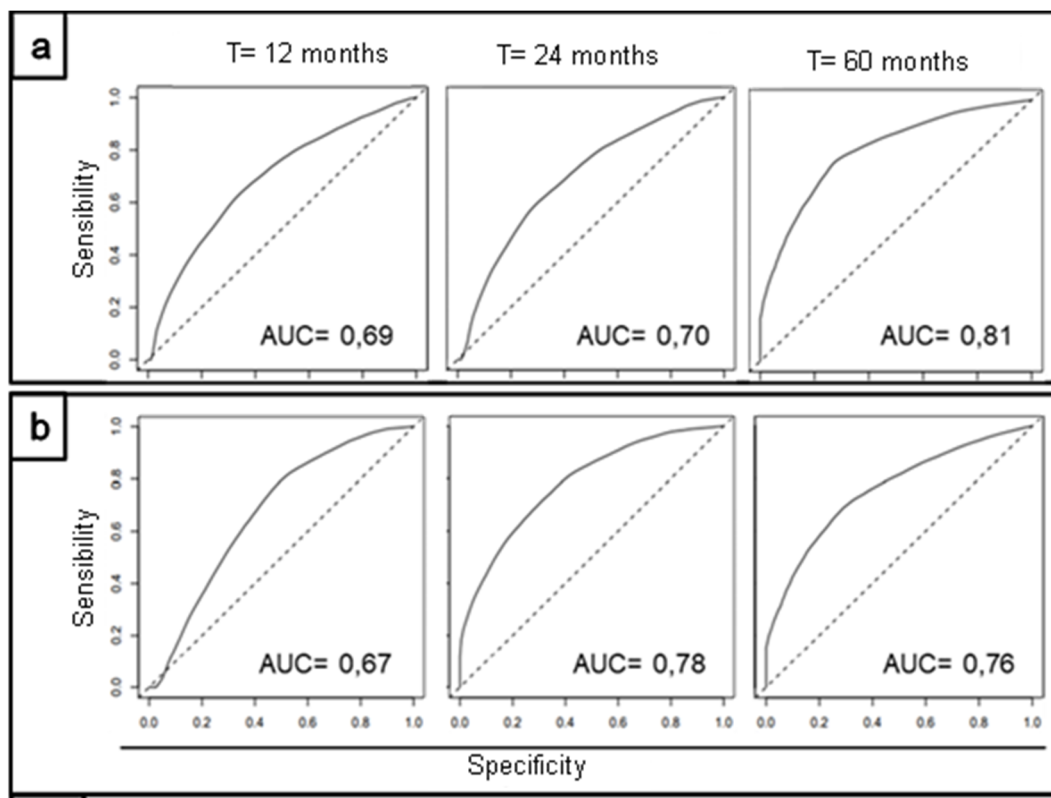

Figure S3. ROC curves at 12, 24 and 60 months of the common gene signature for SG (a) and SLP (b).



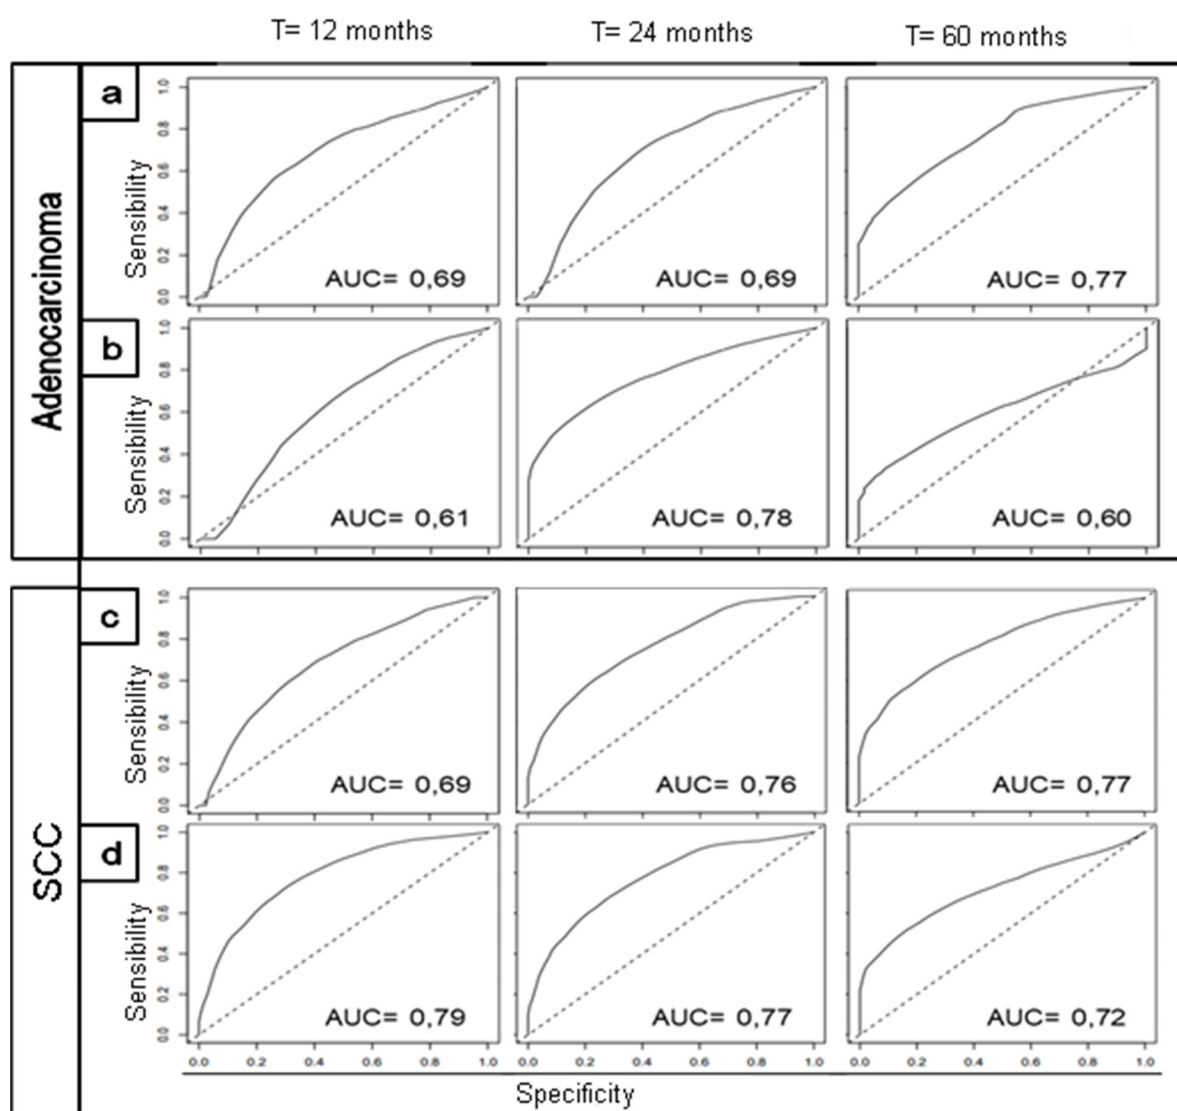

**Figure S4.** ROC curves at 12, 24 and 60 months of the common gene signature for SG (a and c) and SLP (b and d), according to the histologic group Adenocarcinoma and squamous cell carcinoma (SCC).
